# Supplementary material for: Long-Term Fertilization Alters the Storage and Stability of Soil Organic Carbon in Chinese Paddy Soil
Source: MDPI journal article supplement (doi:10.3390/agronomy13061463), 2023-05-25
Supplement: s1 [file s1]

# Supplementary Materials:

Table S1. Analysis of variance (Two-Way ANOVA) for determined soil properties.

| Variable                                | Factor | F value | P value   |
|-----------------------------------------|--------|---------|-----------|
| Bulk density (Mg m <sup>-3</sup> )      | T      | 15.03   | 0.000 *** |
|                                         | D      | 1888.56 | 0.000 *** |
|                                         | T×D    | 18.74   | 0.000 *** |
| Total SOC (g kg <sup>-1</sup> )         | T      | 16.77   | 0.000 *** |
|                                         | D      | 2827.18 | 0.000 *** |
|                                         | T×D    | 18.02   | 0.000 *** |
| Non-labile C (g kg <sup>-1</sup> )      | T      | 6.10    | 0.006 **  |
|                                         | D      | 583.30  | 0.000 *** |
|                                         | T×D    | 3.15    | 0.054 ns  |
| Very labile (g kg <sup>-1</sup> )       | T      | 9.47    | 0.001 *** |
|                                         | D      | 2980.61 | 0.000 *** |
|                                         | T×D    | 10.08   | 0.001 *** |
| Labile C (g kg <sup>-1</sup> )          | T      | 2.59    | 0.089 ns  |
|                                         | D      | 1181.09 | 0.000 *** |
|                                         | T×D    | 0.27    | 0.844 ns  |
| Less Labile C (g kg <sup>-1</sup> )     | T      | 22.80   | 0.000 *** |
|                                         | D      | 338.14  | 0.000 *** |
|                                         | T×D    | 22.15   | 0.000 *** |
| Labile pool (g kg <sup>-1</sup> )       | T      | 4.37    | 0.020 *   |
|                                         | D      | 3891.84 | 0.000 *** |
|                                         | T×D    | 5.66    | 0.008 **  |
| Labile pool (%)                         | T      | 25.46   | 0.000 *** |
|                                         | D      | 3.73    | 0.071 ns  |
|                                         | T×D    | 2.31    | 0.115 ns  |
| Recalcitrant pool (g kg <sup>-1</sup> ) | T      | 28.09   | 0.000 *** |
|                                         | D      | 1253.68 | 0.000 *** |
|                                         | T×D    | 21.24   | 0.000 *** |
| Recalcitrant pool (%)                   | T      | 25.46   | 0.000 *** |
|                                         | D      | 3.73    | 0.071 ns  |
|                                         | T×D    | 2.31    | 0.115 ns  |
| Recalcitrance Index (RI)                | T      | 21.36   | 0.000 *** |
|                                         | D      | 3.64    | 0.075 ns  |
|                                         | T×D    | 2.04    | 0.148 ns  |
| TN (g kg <sup>-1</sup> )                | T      | 22.63   | 0.000 *** |
|                                         | D      | 2148.28 | 0.000 *** |
|                                         | T×D    | 15.30   | 0.000 *** |
| C/N ratio                               | T      | 1.74    | 0.200 ns  |
|                                         | D      | 185.29  | 0.000 *** |
|                                         | T×D    | 0.91    | 0.458 ns  |
| SOC sequestered (Mgha <sup>-1</sup> )   | T      | 10.80   | 0.000 *** |
|                                         | D      | 66.49   | 0.000 *** |
|                                         | T×D    | 12.21   | 0.000 *** |
| SOC accumulation rate                   | T      | 16.77   | 0.000 *** |
|                                         | D      | 91.07   | 0.000 *** |
|                                         | T×D    | 18.02   | 0.000 *** |
| Annual SOC sequestration rate           | T      | 10.80   | 0.000 *** |
|                                         | D      | 66.49   | 0.000 *** |

|     |       |           |
|-----|-------|-----------|
| T×D | 12.21 | 0.000 *** |
|-----|-------|-----------|

D: soil depth interval; T: fertilization treatment; D×T: depth × treatment; \*\*\*: P < 0.001; \*\*: P < 0.01; \*: P < 0.05; ns: not significant. SOC accumulation rate: Total SOC accumulation rate (Mg C ha<sup>-1</sup> year<sup>-1</sup>); Annual SOC sequestration rate (Mg C ha<sup>-1</sup> year<sup>-1</sup>).
